# Supplementary material for: Identifying Novel Genes and Variants in Immune and Coagulation Pathways Associated with Macular Degeneration
Source: PubMed Central journal article supplement — Ophthalmol Sci. 2022 Aug 8;3(1):100206. doi: 10.1016/j.xops.2022.100206 (PMC9574715; doi:10.1016/j.xops.2022.100206), 2022-08-08

**Identifying Novel Genes and Variants in Immune and Coagulation Pathways Associated with Macular Degeneration**

Tianxiao Huan<sup>1</sup>, Shun-Yun Cheng<sup>1</sup>, Bo Tian<sup>1</sup>, Claudio Punzo<sup>1</sup>, Haijiang Lin<sup>1</sup>, Mark Daly<sup>2</sup>, and Johanna Seddon<sup>1\*</sup>

1 Department of Ophthalmology and Visual Sciences, University of Massachusetts Medical School, Worcester, MA

2 Massachusetts General Hospital and Broad Institute, Cambridge, MA

**\*Corresponding author:**

Johanna M. Seddon, M.D., ScM  
Dept. Ophthalmology and Visual Sciences  
University of Massachusetts Medical School  
55 N Lake Ave, Worcester, MA 01655  
Email: [johanna.seddon@umassmed.edu](mailto:johanna.seddon@umassmed.edu)

**Supplementary Figure 1: Multiple sequence alignment and conservation of protein-coding variants in ADAM15 and F2RL2.** Rectangles show the location of rs757672473 [Arg288Cys] in *ADAM15* (A) and rs147969213 [Leu289Arg] in *F2RL2* (B).

**A**

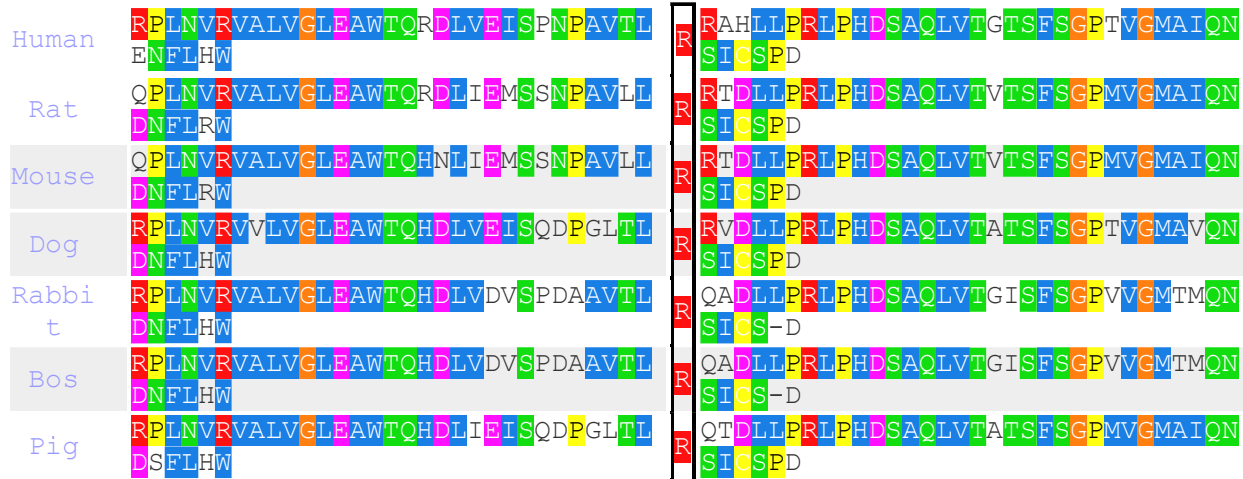

**B**

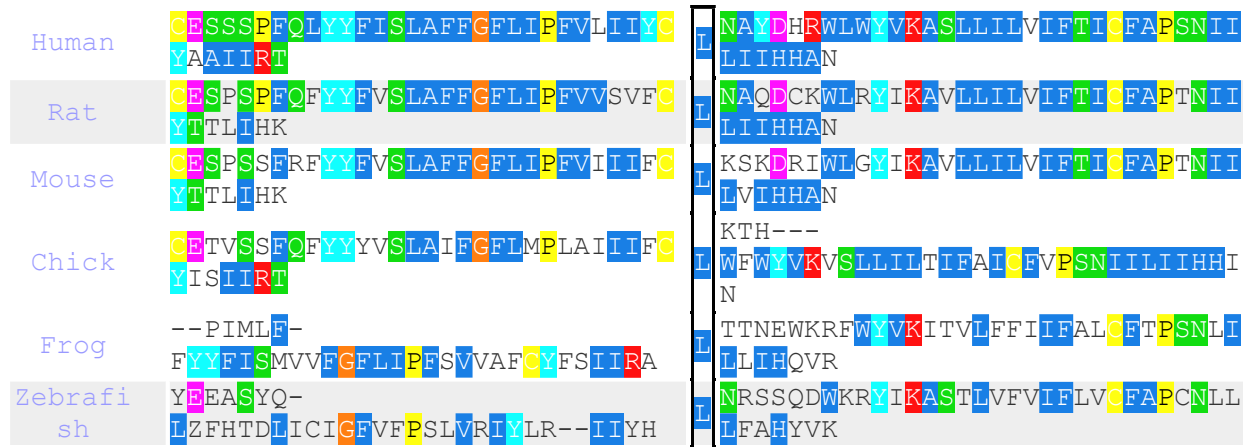

**Supplementary Figure 2: F2RL2 expression levels measured in RNA-seq and single-cell RNA-seq.** The figures are generated by the human protein atlas (more information are provided by <https://www.proteinatlas.org/>). (A) F2RL2 RNA expression in different tissues. Consensus Normalized expression (NX) levels for 55 tissue types and 6 blood cell types, created by combining the data from the three transcriptomics datasets (HPA, GTEx and FANTOM5) using the internal normalization pipeline. Color-coding is based on tissue groups, each consisting of tissues with functional features in common. (B) The distribution of log transformed TPM values for 18,156 genes in 60 tissues from FANTOM5. (C) Single-cell RNA-seq of F2RL2 expression in human retinas. The single-cell RNA-seq data are from Menon M et al. (Reference 28). pTPM: protein-transcripts per million.

**A**

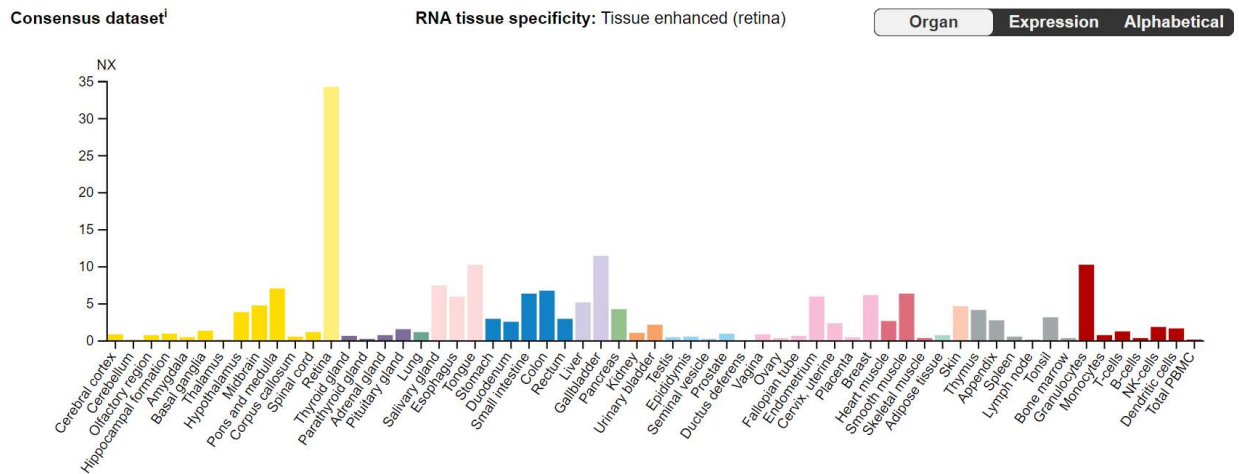

**B**

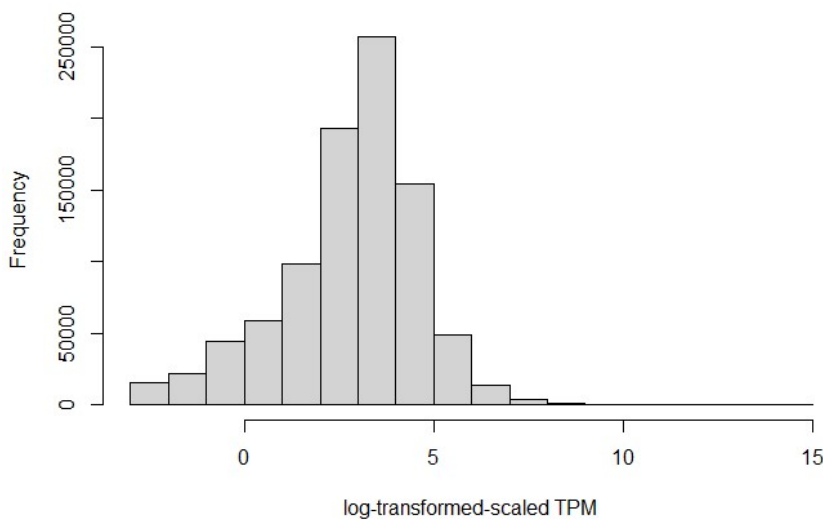

C

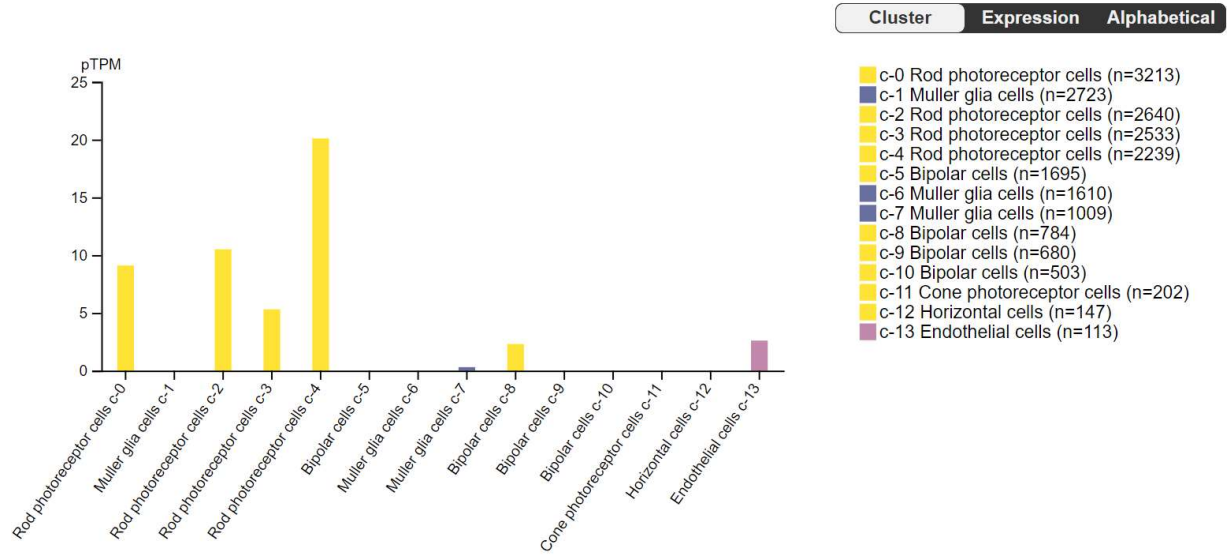

**Supplementary Figure 3: Plots of functional domains and mutations of proteins. (A)** rs757672473 [Arg288Cys] in *ADAM15*; **(B)** rs147969213 [Leu289Arg] in *F2RL2*.

**A**

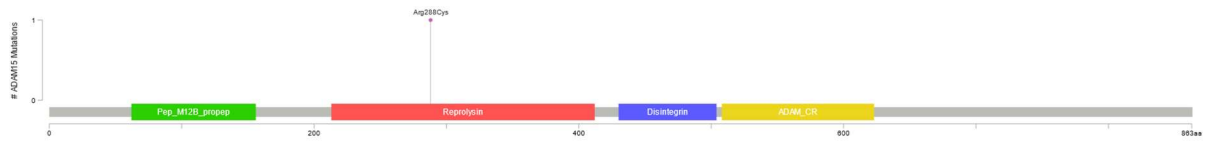

**B**

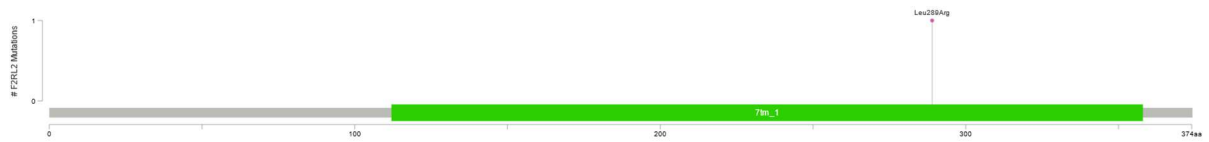

Supplement: mmc1.pdf [file mmc1.pdf]
